# Supplementary material for: Association of MC1R Variants and Host Phenotypes With Melanoma Risk in CDKN2A Mutation Carriers: A GenoMEL Study
Source: PubMed Central journal article supplement — J Natl Cancer Inst. 2010 Oct 20;102(20):1568–83. doi: 10.1093/jnci/djq363 (PMC2957428; doi:10.1093/jnci/djq363), 2010-10-20
Supplement: supp_djq363_JNCI-09-1449R-Suppl_tables.pdf [file supp_djq363_JNCI-09-1449R-Suppl_tables.pdf]

## Supplementary Tables

**Supplementary Table 1.** Number of families with each *CDKN2A* mutation by continent and in all three continents\*

| Location of mutation in <i>CDKN2A</i> gene | <i>CDKN2A</i> sequence variation | Effect of sequence variation on p16INK4a protein | Effect of sequence variation on p14ARF protein | Europe | North America | Australia | All continents |
|--------------------------------------------|----------------------------------|--------------------------------------------------|------------------------------------------------|--------|---------------|-----------|----------------|
| <b>5'UTR</b>                               | c.-34G>T                         | p.?†                                             | NONE                                           | 3      | 3             |           | 6              |
| <b>Exon</b>                                |                                  |                                                  |                                                |        |               |           |                |
| 1α                                         | c.9_32del24                      | p.Ala4_Pro11del                                  | NONE                                           |        |               | 1         | 1              |
| 1α                                         | c.9_32dup24                      | p.Met1_Ser8dup                                   | NONE                                           | 3      | 5             | 2         | 10             |
| 1α                                         | c.44G>A                          | p.Trp15X                                         | NONE                                           |        | 1             |           | 1              |
| 1α                                         | c.46delC                         | p.Leu16TrpfsX10                                  | NONE                                           |        |               | 1         | 1              |
| 1α                                         | c.47T>C                          | p.Leu16Pro                                       | NONE                                           | 1      |               | 1         | 2              |
| 1α                                         | c.47T>G                          | p.Leu16Arg                                       | NONE                                           |        | 1             |           | 1              |
| 1α                                         | c.52_57dup                       | p.Thr18_Ala19dup                                 | NONE                                           | 1      |               |           | 1              |
| 1α                                         | c.68G>A                          | p.Gly23Asp                                       | NONE                                           | 1      | 1             |           | 2              |
| 1α                                         | c.71G>C                          | p.Arg24Pro                                       | NONE                                           | 6      |               | 3         | 9              |
| 1α                                         | c.88delG                         | p.Ala30fs                                        | NONE                                           | 1      |               |           | 1              |
| 1α                                         | c.95T>C                          | p.Leu32Prro                                      | NONE                                           | 3      |               | 1         | 4              |
| 1α                                         | c.104G>C                         | p.Gly35Ala                                       | NONE                                           | 1      |               | 1         | 2              |
| 1α                                         | c.123C>G                         | p.Pro38Arg                                       | NONE                                           | 2      |               |           | 2              |
| 1α                                         | c.132C>A                         | p.Tyr44X                                         | NONE                                           | 1      |               |           | 1              |
| 1α                                         | c.143C>T                         | p.Pro48Leu                                       | NONE                                           | 1      |               |           | 1              |
| 1α                                         | c.149A>C                         | p.Gln50Pro                                       | NONE                                           |        | 1             |           | 1              |
| 1α                                         | c.149A>G                         | p.Gln50Arg                                       | NONE                                           |        |               | 1         | 1              |
| 1β                                         | -5057Ex1β_-2740Ex1αdel           | NONE                                             | -5057Ex1β_-2740Ex1αdel                         | 2      |               |           | 2              |
| 1β                                         | c.60ins16                        | NONE                                             | p.?                                            | 1      |               |           | 1              |
| 2                                          | c.151G>T                         | p.Val51Phe                                       | p.Gly65Val                                     |        |               | 1         | 1              |
| 2                                          | c.157A>G                         | p.Met53Val                                       | p.Asp67Gly                                     |        | 1             |           | 1              |
| 2                                          | c.158T>C                         | p.Met53Thr                                       | p.= ‡                                          | 1      |               |           | 1              |
| 2                                          | c.159G>C                         | p.Met53Ile                                       | p.Asp68His                                     | 10     | 4             | 4         | 18             |
| 2                                          | c.167_197del                     | p.Ser56fs                                        | chimeric p14ARF-p16 protein                    |        | 1             |           | 1              |
| 2                                          | c.167G>T                         | p.Ser56Ile                                       | p.Gln70His                                     | 2      |               |           | 2              |
| 2                                          | c.172C>T                         | p.Arg58X                                         | p.Pro72Leu                                     |        | 1             |           | 1              |
| 2                                          | c.176T>G                         | p.Val59Gly                                       | p.Ser73Arg                                     | 2      |               |           | 2              |
| 2                                          | c.185T>C                         | p.Leu62Pro                                       | p.=                                            | 1      |               |           | 1              |
| 2                                          | c.194T>C                         | p.Leu65Pro                                       | p.=                                            | 2      |               |           | 2              |
| 2                                          | c.199G>A                         | p.Gly67Ser                                       | p.Arg81Gln                                     | 1      |               |           | 1              |
| 2                                          | c.199G>C                         | p.Gly67Arg                                       | p.Arg81Pro                                     | 2      |               |           | 2              |
| 2                                          | c.199_213del15                   | p.Gly67_Asn71del                                 | p.Pro17_Val22delinsLeu                         | 1      |               |           | 1              |
| 2                                          | c.202_203GC>TT                   | p.Ala68Leu                                       | p.Arg82Leu                                     | 2      |               |           | 2              |
| 2                                          | c.206A>G                         | p.Glu69Gly                                       | p.=                                            | 1      |               |           | 1              |
| 2                                          | c.212A>G                         | p.Asn71Ser                                       | p.=                                            |        | 1             |           | 1              |
| 2                                          | c.213C>A                         | p.Asn71Lys                                       | p.Leu86Met                                     | 2      |               |           | 2              |
| 2                                          | c.225_243del                     | p.Ala76fs                                        | fusion p14ARF                                  | 8      | 3             |           | 11             |

|                                                |              |             |                     |            |           |           |            |
|------------------------------------------------|--------------|-------------|---------------------|------------|-----------|-----------|------------|
|                                                |              |             | 1_90, p16           |            |           |           |            |
|                                                |              |             | 82_156              |            |           |           |            |
| 2                                              | c.240_253del | p.Pro81fs   | p.Thr95fs           |            | 2         |           | 2          |
| 2                                              | c.242C>T     | p.Pro81Leu  | p.=                 | 1          |           |           | 1          |
| 2                                              | c.247C>A     | p.His83Gln  | p.Ala97Glu          | 1          |           |           | 1          |
| 2                                              | c.251A>C     | p.Asp84Ala  | p.=                 | 1          |           |           | 1          |
| 2                                              | c.259C>T     | p.Arg87Trp  | p.Pro101Leu         | 1          |           |           | 1          |
| 2                                              | c.260G>C     | p.Arg87Pro  | p.=                 |            | 1         |           | 1          |
| 2                                              | c.281T>C     | p.Leu94Pro  | p.=                 | 1          |           |           | 1          |
| 2                                              | c.296G>C     | p.Arg99Pro  | p.=                 | 2          |           |           | 2          |
| 2                                              | c.301G>T     | p.Gly101Trp | p.Arg115Leu         | 29         | 3         |           | 32         |
| 2                                              | c.307_308del | p.Arg103fs  | p.Ala117fs          | 1          | 1         |           | 2          |
| 2                                              | c.322G>A     | p.Asp108Asn | p.Arg122Gln         | 1          |           | 1         | 2          |
| 2                                              | c.334C>G     | p.Arg112Gly | p.Pro126Arg         | 2          |           |           | 2          |
| 2                                              | c.332_334dup | p.Arg112dup | p.127_128ins<br>Ser | 11         |           |           | 11         |
| 2                                              | c.340C>T     | p.Pro114Ser | p.Ala128Val         | 1          |           |           | 1          |
| 2                                              | c.344T>G     | p.Val115Gly | p.=                 | 1          |           |           | 1          |
| 2                                              | c.352G>A     | p.Ala118Thr | p.Gly132Asp         | 1          |           |           | 1          |
| 2                                              | c.358del     | p.Glu120fs  | p.Glu120fs          | 1          |           |           | 1          |
| 2                                              | c.377T>A     | p.Val126Asp | NONE                | 1          | 5         |           | 6          |
| 2                                              | c.430C>T     | p.Arg144Cys | NONE                | 1          |           |           | 1          |
| 2                                              | c.457G>T     | p.Asp153Tyr | NONE                |            | 2         |           | 2          |
| <b>Exons 1<math>\alpha</math>,<br/>2 and 3</b> |              | Deletion    | Deletion            | 1          |           |           | 1          |
| <b>Intron</b>                                  |              |             |                     |            |           |           |            |
| 1 $\beta$                                      | c.193+3A>G   | NONE        | p.?                 | 1          |           |           | 1          |
| 2                                              | c.457+1G>T   | p.?         | p.?                 | 1          | 1         |           | 2          |
| 2                                              | c.458-105A>G | p.?         | NONE                | 7          | 1         | 1         | 9          |
| <b>Total no. of families</b>                   |              |             |                     | <b>129</b> | <b>39</b> | <b>18</b> | <b>186</b> |

\*A total of 186 families from the Melanoma Genetics Consortium (GenoMEL) with at least two melanoma cases and presence of a *CDKN2A* mutation contributed to the study. The protocol for detecting *CDKN2A* mutations has been described elsewhere (7, 30, 31). Sequence variations (c.), including nucleotide changes, duplications, insertions, deletions, are described as recommended by the Ad-Hoc Committee of the Human Genome Variation Society (HGVS; <http://www.hgvs.org/>). Nucleotides are numbered from the first A of the ATG-translation initiation codon. The effect of sequence variations on the protein (p.) follows the HGVS recommendations. *CDKN2A* = cyclin-dependent kinase inhibitor 2A; UTR = untranslated region; del = deletion; dup = duplication; ins = insertion.

† Indicates a yet unknown change at the protein level and was used for insertion, deletion, intronic or 5'-UTR sequence variations.

‡ Indicates a silent change at the protein level (synonymous variation).

**Supplementary Table 2.** Frequency of *MC1R* variants in affected and unaffected *CDKN2A* mutations carriers analyzed by continent and in all three continents\*

| <b>MC1R amino acid change</b>                  | <b>Affected <i>CDKN2A</i> mutations carriers</b>                |                                                               |                                                              |                                                               |                                                              |                                                               |                                                                 |                                                               | <b>Unaffected <i>CDKN2A</i> mutations carriers</b>              |                                                               |                                                                 |                                                               |                                                                 |                                                               |                                                                 |                                                               |
|------------------------------------------------|-----------------------------------------------------------------|---------------------------------------------------------------|--------------------------------------------------------------|---------------------------------------------------------------|--------------------------------------------------------------|---------------------------------------------------------------|-----------------------------------------------------------------|---------------------------------------------------------------|-----------------------------------------------------------------|---------------------------------------------------------------|-----------------------------------------------------------------|---------------------------------------------------------------|-----------------------------------------------------------------|---------------------------------------------------------------|-----------------------------------------------------------------|---------------------------------------------------------------|
|                                                | <b>Europe</b>                                                   |                                                               | <b>North America</b>                                         |                                                               | <b>Australia</b>                                             |                                                               | <b>All continents</b>                                           |                                                               | <b>Europe</b>                                                   |                                                               | <b>North America</b>                                            |                                                               | <b>Australia</b>                                                |                                                               | <b>All continents</b>                                           |                                                               |
|                                                | No. of chromosomes <sup>†</sup> (n= 540)                        |                                                               | No. of chromosomes <sup>†</sup> (n= 232)                     |                                                               | No. of chromosomes <sup>†</sup> (n=174)                      |                                                               | No. of chromosomes <sup>†</sup> (n= 946)                        |                                                               | No. of chromosomes <sup>†</sup> (n= 454)                        |                                                               | No. of chromosomes <sup>†</sup> (n= 154)                        |                                                               | No. of chromosomes <sup>†</sup> (n= 76)                         |                                                               | No. of chromosomes <sup>†</sup> (n= 684)                        |                                                               |
|                                                | No. of chrom. with and without <i>MC1R</i> variant <sup>‡</sup> | % of chrom. with and without <i>MC1R</i> variant <sup>§</sup> | No. of chrom. w and without <i>MC1R</i> variant <sup>‡</sup> | % of chrom. with and without <i>MC1R</i> variant <sup>§</sup> | No. of chrom. w and without <i>MC1R</i> variant <sup>‡</sup> | % of chrom. with and without <i>MC1R</i> variant <sup>§</sup> | No. of chrom. with and without <i>MC1R</i> variant <sup>‡</sup> | % of chrom. with and without <i>MC1R</i> variant <sup>§</sup> | No. of chrom. with and without <i>MC1R</i> variant <sup>‡</sup> | % of chrom. with and without <i>MC1R</i> variant <sup>§</sup> | No. of chrom. with and without <i>MC1R</i> variant <sup>‡</sup> | % of chrom. with and without <i>MC1R</i> variant <sup>§</sup> | No. of chrom. with and without <i>MC1R</i> variant <sup>‡</sup> | % of chrom. with and without <i>MC1R</i> variant <sup>§</sup> | No. of chrom. with and without <i>MC1R</i> variant <sup>‡</sup> | % of chrom. with and without <i>MC1R</i> variant <sup>§</sup> |
| Consensus sequence <sup>‡</sup>                | 168                                                             | 31.1                                                          | 64                                                           | 27.6                                                          | 59                                                           | 33.9                                                          | 291                                                             | 30.8                                                          | 218                                                             | 48.0                                                          | 81                                                              | 52.6                                                          | 37                                                              | 48.7                                                          | 336                                                             | 49.1                                                          |
| Non-synonymous frequent variants <sup>  </sup> |                                                                 |                                                               |                                                              |                                                               |                                                              |                                                               |                                                                 |                                                               |                                                                 |                                                               |                                                                 |                                                               |                                                                 |                                                               |                                                                 |                                                               |
| V60L                                           | 73                                                              | 13.5                                                          | 47                                                           | 20.3                                                          | 22                                                           | 12.6                                                          | 142                                                             | 15                                                            | 50                                                              | 11.0                                                          | 16                                                              | 10.4                                                          | 4                                                               | 5.3                                                           | 70                                                              | 10.2                                                          |
| V92M                                           | 53                                                              | 9.8                                                           | 19                                                           | 8.2                                                           | 13                                                           | 7.5                                                           | 85                                                              | 9.0                                                           | 52                                                              | 11.5                                                          | 10                                                              | 6.5                                                           | 8                                                               | 10.5                                                          | 70                                                              | 10.2                                                          |
| R151C                                          | 80                                                              | 14.8                                                          | 29                                                           | 12.5                                                          | 51                                                           | 29.3                                                          | 160                                                             | 16.9                                                          | 36                                                              | 7.9                                                           | 11                                                              | 7.1                                                           | 10                                                              | 13.2                                                          | 57                                                              | 8.3                                                           |
| R160W                                          | 58                                                              | 10.7                                                          | 27                                                           | 11.6                                                          | 13                                                           | 7.5                                                           | 98                                                              | 10.4                                                          | 36                                                              | 7.9                                                           | 6                                                               | 3.9                                                           | 4                                                               | 5.3                                                           | 46                                                              | 6.7                                                           |
| Non-synonymous rare variants <sup>¶</sup>      |                                                                 |                                                               |                                                              |                                                               |                                                              |                                                               |                                                                 |                                                               |                                                                 |                                                               |                                                                 |                                                               |                                                                 |                                                               |                                                                 |                                                               |
| N15S                                           | -                                                               | -                                                             | 0                                                            | 0                                                             | 0                                                            | 0                                                             | 0                                                               | 0                                                             | 0                                                               | 0                                                             | 0                                                               | 0                                                             | 1                                                               | 1.3                                                           | 1                                                               | .1                                                            |
| H69P                                           | 0                                                               | 0                                                             | 0                                                            | 0                                                             | 0                                                            | 0                                                             | 0                                                               | 0                                                             | 1                                                               | .2                                                            | 0                                                               | 0                                                             | 0                                                               | 0                                                             | 1                                                               | .1                                                            |
| S83P                                           | 0                                                               | 0                                                             | 3                                                            | 1.3                                                           | 0                                                            | 0                                                             | 3                                                               | .3                                                            | 0                                                               | 0                                                             | 1                                                               | .6                                                            | 0                                                               | 0                                                             | 1                                                               | .2                                                            |
| S83L                                           | 1                                                               | .2                                                            | 0                                                            | 0                                                             | 0                                                            | 0                                                             | 1                                                               | .1                                                            | 1                                                               | .2                                                            | 0                                                               | 0                                                             | 0                                                               | 0                                                             | 1                                                               | .1                                                            |
| D84E                                           | 7                                                               | 1.3                                                           | 3                                                            | 1.3                                                           | 2                                                            | 1.1                                                           | 12                                                              | 1.3                                                           | 2                                                               | .4                                                            | 3                                                               | 1.9                                                           | 0                                                               | 0                                                             | 5                                                               | .7                                                            |
| T95M                                           | 2                                                               | .4                                                            | 0                                                            | 0                                                             | 0                                                            | 0                                                             | 2                                                               | .2                                                            | 1                                                               | .2                                                            | 0                                                               | 0                                                             | 0                                                               | 0                                                             | 1                                                               | .1                                                            |
| V122M                                          | 2                                                               | .4                                                            | 0                                                            | 0                                                             | 0                                                            | 0                                                             | 2                                                               | .2                                                            | 0                                                               | 0                                                             | 0                                                               | 0                                                             | 0                                                               | 0                                                             | 0                                                               | 0                                                             |
| M128K                                          | 0                                                               | 0                                                             | 0                                                            | 0                                                             | 0                                                            | 0                                                             | 0                                                               | 0                                                             | 1                                                               | .2                                                            | 0                                                               | 0                                                             | 0                                                               | 0                                                             | 1                                                               | .1                                                            |
| R142H                                          | 4                                                               | .7                                                            | 1                                                            | .4                                                            | 0                                                            | 0                                                             | 5                                                               | .5                                                            | 1                                                               | .2                                                            | 0                                                               | 0                                                             | 0                                                               | 0                                                             | 1                                                               | .1                                                            |
| Y152X                                          | 2                                                               | .4                                                            | 0                                                            | 0                                                             | 0                                                            | 0                                                             | 2                                                               | .2                                                            | 0                                                               | 0                                                             | 0                                                               | 0                                                             | 1                                                               | 1.3                                                           | 1                                                               | .2                                                            |
| I155T                                          | 10                                                              | 1.9                                                           | 5                                                            | 2.2                                                           | 1                                                            | .6                                                            | 16                                                              | 1.7                                                           | 2                                                               | .4                                                            | 5                                                               | 3.2                                                           | 0                                                               | 0                                                             | 7                                                               | 1.0                                                           |
| R163Q                                          | 32                                                              | 5.9                                                           | 9                                                            | 3.9                                                           | 6                                                            | 3.4                                                           | 47                                                              | 5.0                                                           | 19                                                              | 4.2                                                           | 3                                                               | 1.9                                                           | 5                                                               | 6.6                                                           | 27                                                              | 3.9                                                           |
| A171G                                          | 1                                                               | .2                                                            | 0                                                            | 0                                                             | 0                                                            | 0                                                             | 1                                                               | .1                                                            | 1                                                               | .2                                                            | 0                                                               | 0                                                             | 0                                                               | 0                                                             | 1                                                               | .1                                                            |
| F196L                                          | 0                                                               | 0                                                             | 0                                                            | 0                                                             | 0                                                            | 0                                                             | 0                                                               | 0                                                             | 1                                                               | .2                                                            | 0                                                               | 0                                                             | 0                                                               | 0                                                             | 1                                                               | .1                                                            |
| A218T                                          | 1                                                               | .2                                                            | 0                                                            | 0                                                             | 0                                                            | 0                                                             | 1                                                               | .1                                                            | 0                                                               | 0                                                             | 0                                                               | 0                                                             | 0                                                               | 0                                                             | 0                                                               | 0                                                             |
| A218G                                          | 1                                                               | .2                                                            | 0                                                            | 0                                                             | 0                                                            | 0                                                             | 1                                                               | .1                                                            | 0                                                               | 0                                                             | 0                                                               | 0                                                             | 0                                                               | 0                                                             | 0                                                               | 0                                                             |
| I221T                                          | 2                                                               | .4                                                            | 0                                                            | 0                                                             | 0                                                            | 0                                                             | 2                                                               | .2                                                            | 0                                                               | 0                                                             | 0                                                               | 0                                                             | 0                                                               | 0                                                             | 0                                                               | 0                                                             |
| N279D                                          | 2                                                               | .4                                                            | 0                                                            | 0                                                             | 0                                                            | 0                                                             | 2                                                               | .2                                                            | 3                                                               | .7                                                            | 0                                                               | 0                                                             | 0                                                               | 0                                                             | 3                                                               | .4                                                            |
| D294H                                          | 18                                                              | 3.3                                                           | 12                                                           | 5.3                                                           | 5                                                            | 2.9                                                           | 35                                                              | 3.7                                                           | 3                                                               | .7                                                            | 4                                                               | 2.6                                                           | 3                                                               | 3.9                                                           | 10                                                              | 1.5                                                           |

|                              |    |      |    |      |   |     |    |     |    |      |    |      |   |     |    |      |
|------------------------------|----|------|----|------|---|-----|----|-----|----|------|----|------|---|-----|----|------|
| Insertions                   |    |      |    |      |   |     |    |     |    |      |    |      |   |     |    |      |
| g_86_87insA                  | 1  | .2   | 2  | .9   | 0 | 0   | 3  | .3  | 0  | 0    | 3  | 1.9  | 0 | 0   | 3  | .5   |
| g_537_538insC                | 1  | .2   | 0  | 0    | 0 | 0   | 1  | .1  | 0  | 0    | 0  | 0    | 0 | 0   | 0  | 0    |
| Synonymous frequent variants |    |      |    |      |   |     |    |     |    |      |    |      |   |     |    |      |
| T314T                        | 54 | 10.0 | 25 | 11.0 | 4 | 2.4 | 83 | 8.8 | 48 | 10.6 | 16 | 10.4 | 5 | 6.6 | 69 | 10.1 |
| Synonymous rare variants¶    |    |      |    |      |   |     |    |     |    |      |    |      |   |     |    |      |
| R34R                         | 0  | 0    | 1  | .4   | 0 | 0   | 1  | .1  | 0  | 0    | 0  | 0    | 0 | 0   | 0  | 0    |
| C133C                        | 1  | .2   | 0  | 0    | 0 | 0   | 1  | .1  | 0  | 0    | 0  | 0    | 0 | 0   | 0  | 0    |
| R213R                        | 0  | 0    | 0  | 0    | 0 | 0   | 0  | 0   | 1  | .2   | 0  | 0    | 0 | 0   | 1  | .1   |
| Q233Q                        | 0  | 0    | 0  | 0    | 0 | 0   | 0  | 0   | 2  | .5   | 0  | 0    | 0 | 0   | 2  | .3   |
| A240A                        | 0  | 0    | 0  | 0    | 0 | 0   | 0  | 0   | 0  | 0    | 1  | .6   | 0 | 0   | 1  | .1   |
| I264I                        | 0  | 0    | 3  | 1.3  | 0 | 0   | 3  | .3  | 0  | 0    | 0  | 0    | 0 | 0   | 0  | 0    |
| S316S                        | 1  | .2   | 0  | 0    | 0 | 0   | 1  | .1  | 0  | 0    | 0  | 0    | 1 | 1.3 | 1  | .2   |

\*The frequency of *MC1R* variants was estimated in affected (melanoma patients) and unaffected *CDKN2A* mutation carriers genotyped for *MC1R* (473 affected mutation carriers: 270 from Europe, 116 from North America, 87 from Australia; 342 unaffected mutation carriers: 227 from Europe, 77 from North America, 38 from Australia). *CDKN2A* = cyclin-dependent kinase inhibitor 2A. *MC1R* = melanocortin-1 receptor. chrom. = chromosome.

†The number of chromosomes was twice the number of *CDKN2A* mutation carriers genotyped for *MC1R*..

‡The number of chromosomes carrying no *MC1R* variant (consensus sequence) and those carrying a given variant are shown for affected and unaffected *CDKN2A* mutation carriers per continent and in all three continents.

§The proportions shown in this table are the number of chromosomes carrying no *MC1R* variant (consensus sequence) or a given variant divided by the total number of chromosomes in affected and unaffected *CDKN2A* mutation carriers per continent and in all three continents.

|| The frequent variants shown in this table are those with an estimated frequency greater than or equal to 5% in *CDKN2A* mutation carriers from at least one continent and all three continents.

¶ The rare variants shown in this table are those with an estimated frequency less than 5% in *CDKN2A* mutation carriers from all three continents.

**Supplementary Table 3.** Association of *MC1R* variants and number of *MC1R* variants with melanoma risk in *CDKN2A* mutation carriers analyzed by country within Europe\*

| Country         | No. of participants affected / unaffected <sup>†</sup> | Any <i>MC1R</i> variant  |                  | Number of <i>MC1R</i> variants |                  |                          |                  | Trend test<br>$P_{\text{trend}}$ <sup>  </sup> |
|-----------------|--------------------------------------------------------|--------------------------|------------------|--------------------------------|------------------|--------------------------|------------------|------------------------------------------------|
|                 |                                                        | OR (95% CI) <sup>‡</sup> | $P$ <sup>§</sup> | 1 variant                      |                  | $\geq 2$ variants        |                  |                                                |
|                 |                                                        |                          |                  | OR (95% CI) <sup>‡</sup>       | $P$ <sup>§</sup> | OR (95% CI) <sup>‡</sup> | $P$ <sup>§</sup> |                                                |
| France          | 52/43                                                  | 4.93 (1.73 to 14.02)     | .02              | 1.68 (.58 to 4.84)             | .25              | 8.00 (2.96 to 21.66)     | .007             | .002                                           |
| Italy           | 32/14                                                  | 1.10 (.35 to 3.53)       | .87              | 1.12 (.35 to 3.53)             | .85              | .97 (.05 to 17.28)       | .98              | .94                                            |
| The Netherlands | 52/61                                                  | 1.46 (.64 to 3.32)       | .44              | .93 (.42 to 2.06)              | .87              | 3.07 (1.12 to 8.40)      | .12              | .16                                            |
| Spain           | 30/36                                                  | 9.45 (2.48 to 36.05)     | .04              | 8.25 (2.0 to 34.07)            | .04              | 11.40 (2.66 to 48.79)    | .02              | .03                                            |
| Sweden          | 22/26                                                  | 12.01 (2.61 to 55.20)    | .04              | 13.2 (2.0 to 87.6)             | .03              | 11.09 (3.57 to 34.43)    | .04              | .09                                            |
| United Kingdom  | 82/47                                                  | 2.28 (.77 to 6.81)       | .19              | 1.48 (.47 to 4.68)             | .50              | 3.64 (1.14 to 11.60)     | .07              | .02                                            |

\*The association of each *MC1R* variable (any *MC1R* variant, number of *MC1R* variants) with melanoma risk was estimated by using homozygosity for the *MC1R* consensus sequence as the reference category. *CDKN2A* = cyclin-dependent kinase inhibitor 2A. *MC1R* = melanocortin-1 receptor. OR = odds ratio. CI = confidence interval.

<sup>†</sup>The number of GenoMEL participants from each European country contributing to the analysis of a given *MC1R* variable (any *MC1R* variant, number of *MC1R* variants) that were affected with melanoma and their unaffected relatives.

<sup>‡</sup> The odds ratios and 95% confidence intervals were estimated by the generalized estimating equations (GEE) method using a logit link function and an exchangeable correlation matrix to take into account the correlations among the family members' melanoma affection status (affected, unaffected). The odds ratios shown in this table are adjusted for age, sex.

<sup>§</sup> $P$  values associated with the two-sided generalized score test used to test for association between melanoma risk and *MC1R* variants.

<sup>||</sup> $P_{\text{trend}}$  values associated with the two-sided trend test which tests for a change in melanoma risk with a linear increase in the number of *MC1R* variants (0, 1,  $\geq 2$  variants).

**Supplementary Table 4.** Associations of *MC1R* variants with melanoma risk stratified by hair color in *CDKN2A* mutation carriers from all continents\*

| <i>MC1R</i> Variants                   | Red or blond hair                          |                     |            | Brown or black hair                        |                      |                         |
|----------------------------------------|--------------------------------------------|---------------------|------------|--------------------------------------------|----------------------|-------------------------|
|                                        | No. of participants affected / unaffected† | OR (95% CI)‡        | <i>P</i> § | No. of participants affected / unaffected† | OR (95% CI)‡         | <i>P</i> §              |
| <b>Individual <i>MC1R</i> variants</b> |                                            |                     |            |                                            |                      |                         |
| V60L                                   | 40/ 20                                     | .95 (.31 to 2.94)   | .93        | 92/100                                     | 3.10 (1.60 to 6.01)  | .004                    |
| V92M                                   | 30/20                                      | .93 (.28 to 3.12)   | .91        | 75/100                                     | 2.69 (1.43 to 5.04)  | .005                    |
| R151C                                  | 67/21                                      | 4.01 (.90 to 17.81) | .08        | 75/83                                      | 4.07 (1.98 to 8.37)  | .0004                   |
| R160W                                  | 53/21                                      | 1.73 (.55 to 5.48)  | .35        | 57/80                                      | 3.41 (1.56 to 7.47)  | .01                     |
| <b>No of <i>MC1R</i> variants</b>      | 128/56                                     |                     |            | 213/185                                    |                      |                         |
| 1                                      |                                            | .79 (.25 to 2.55)   | .70        |                                            | 2.51 (1.48 to 4.28)  | .003                    |
| ≥ 2                                    |                                            | 2.62 (.91 to 7.54)  | .09        |                                            | 5.15 (2.65 to 10.00) | 5.55 × 10 <sup>-5</sup> |

\*The associations of individual *MC1R* variants and number of *MC1R* variants were estimated by using individuals homozygotes for the *MC1R* consensus sequence as the reference category. *CDKN2A* = cyclin-dependent kinase inhibitor 2A. *MC1R* = melanocortin-1 receptor. OR = odds ratio. CI = confidence interval.

†The number of GenoMEL participants contributing to the analysis of a given *MC1R* variable (individual *MC1R* variants, number of *MC1R* variants) that were affected with melanoma and their unaffected relatives for each category of hair color (red or blond vs brown or black).

‡The odds ratios and 95% confidence intervals were estimated by the generalized estimating equations (GEE) method using a logit link function and an exchangeable correlation matrix to take into account the correlations among the family members' melanoma affection status (affected, unaffected). The odds ratios shown in this table are adjusted for age, sex and geographic locales.

§*P* values associated with the two-sided generalized score test used to test for association between melanoma and *MC1R* variants.
